# Supplementary material for: Comparative bioenergetic assessment of transformed cells using a cell energy budget platform
Source: Royal Society of Chemistry journal article supplement (doi:10.1039/c1ib00050k), 2011-01-01
Supplement: c1ib00050k.pdf [file c1ib00050k.pdf]

## Supplementary Material

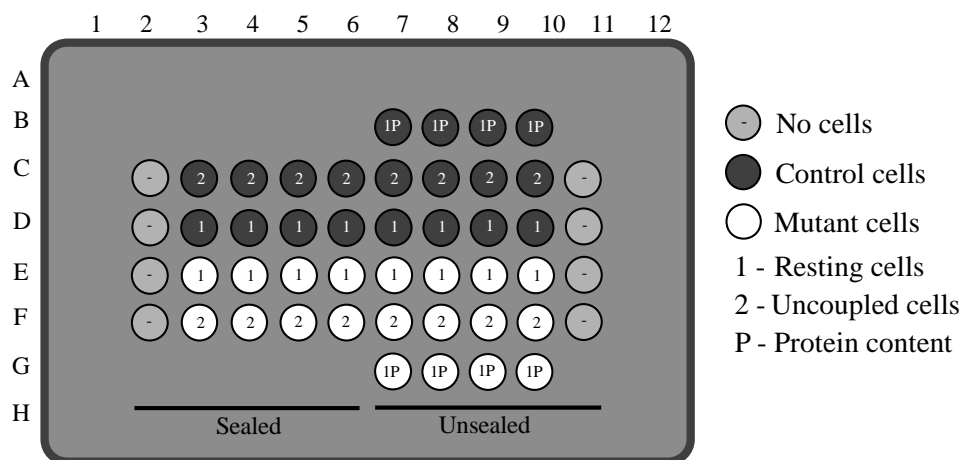

Figure S1. Plate layout for CEB assessment and cross-comparison of different cell types. Cells are normally seeded in central wells, while side wells are filled with medium to ensure uniform temperature and humidity across the plate. The wells containing probe without cells are used as controls to correct for non-specific signal drift. The OCR and T-ECA are measured in the wells sealed with mineral oil; L-ECA, ATP and protein content are measured in unsealed wells.

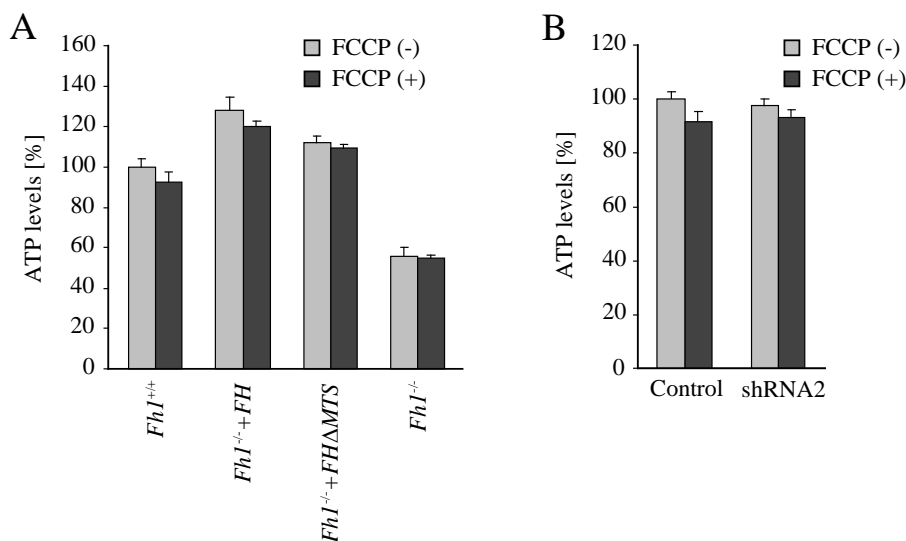

Figure S2. Total cellular ATP levels in Fh1 and PNC1 model cells. A. For Fh1 model, ATP levels in all four MEFs lines vary, reflecting considerable differences in cell phenotype associated with Fh1/FH expression. Treatment with FCCP/oligomycin does not lead to significant changes in cellular ATP. B. ATP levels in HeLa are not affected by reduction in PNC1 expression or FCCP/oligomycin treatment.
